# Supplementary material
Source: Springer Nature journal article supplement (https://www.springermedizin.de/resource/supplementary/12968_2011_2022_MOESM3_ESM.pdf/9581164)

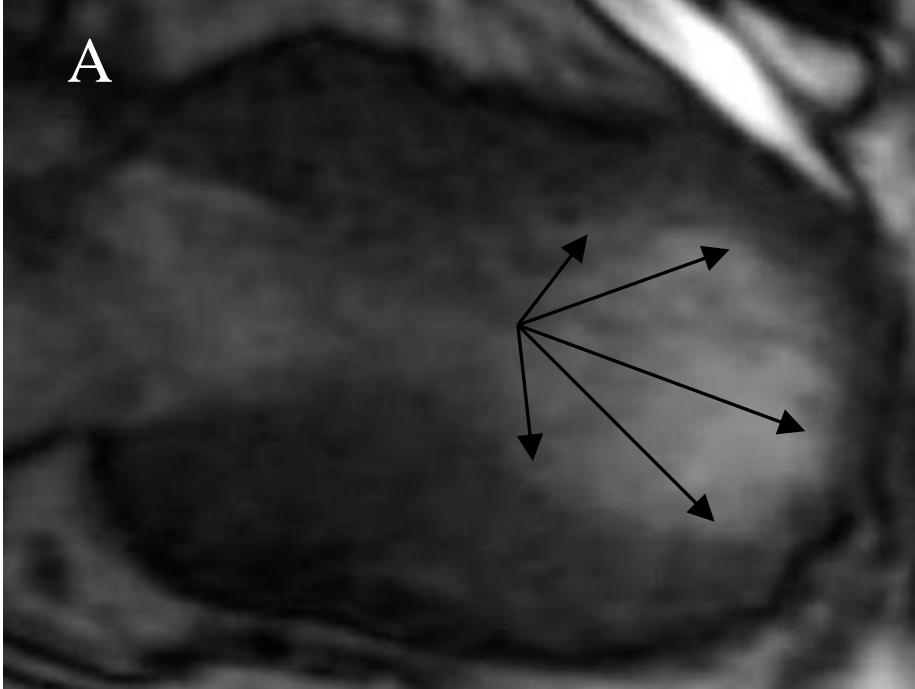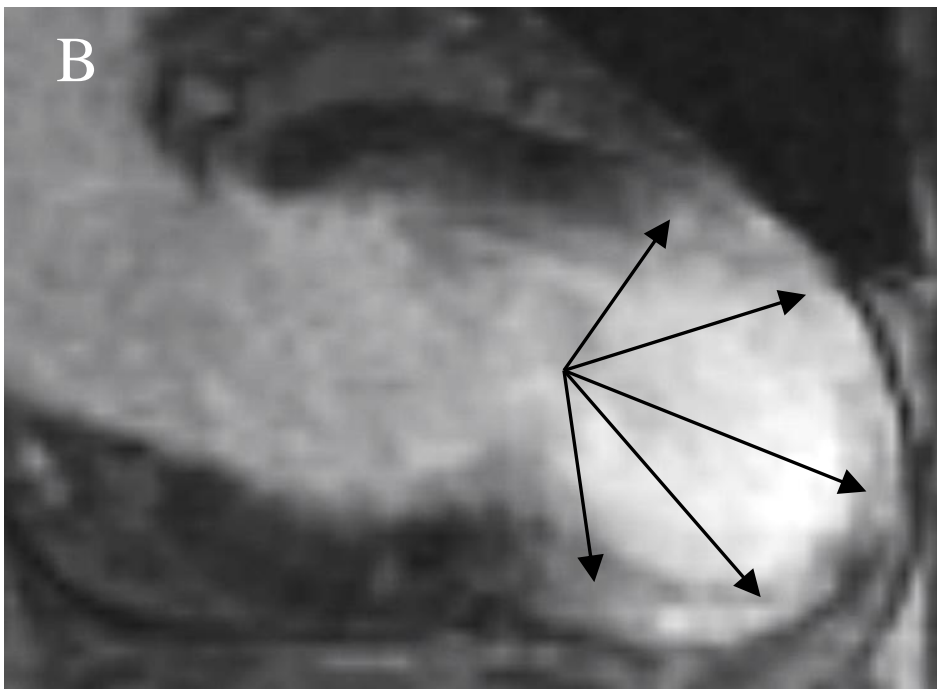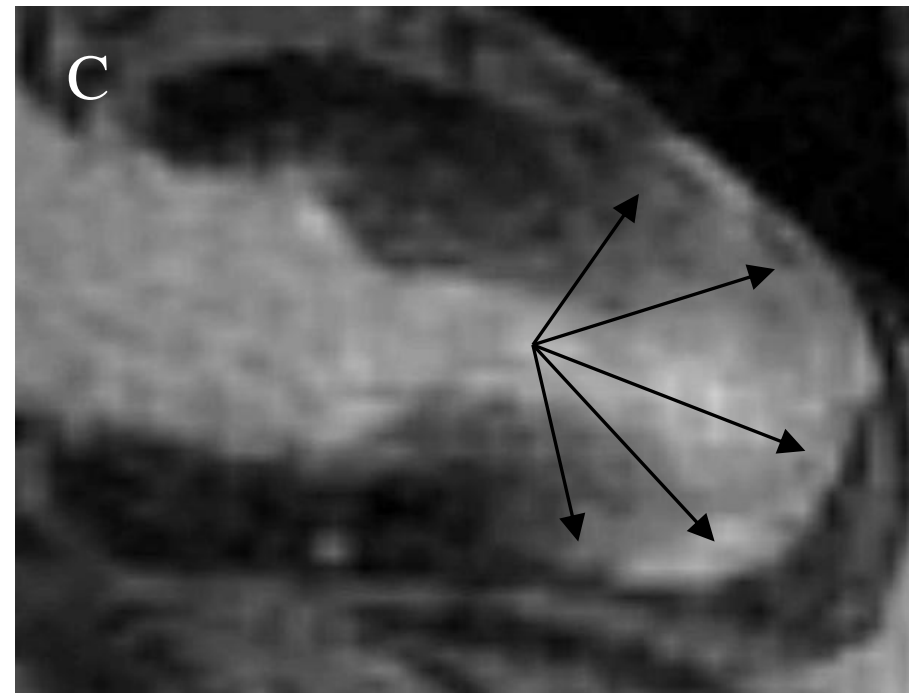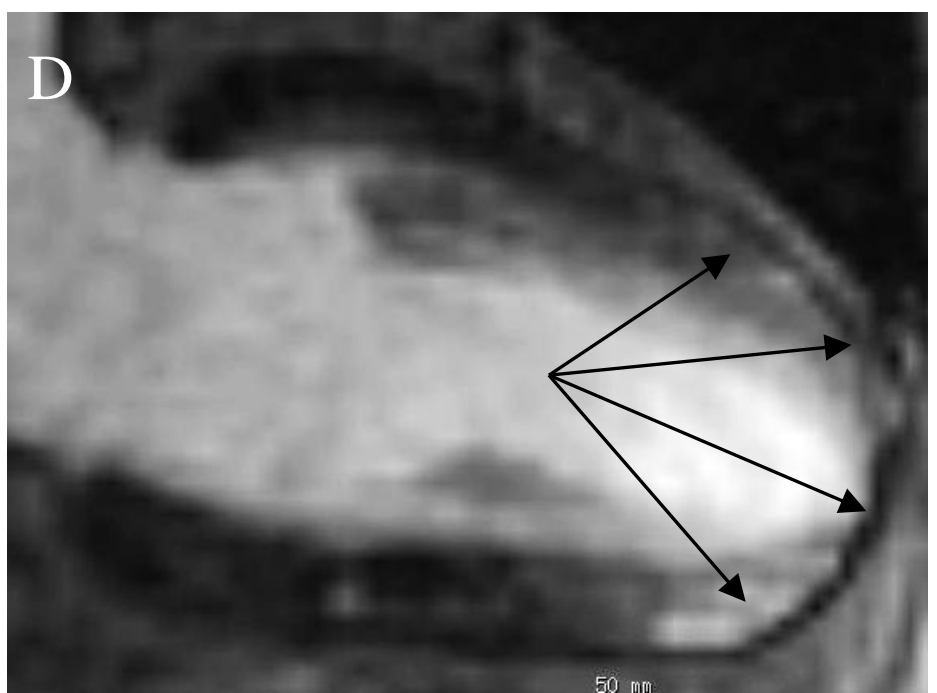

Supplement: MOESM3 [file 9581164]
